# Supplementary material for: Toroidal versus centripetal arrangement of the magnetic moment in a Dy4 tetrahedron
Source: Royal Society of Chemistry journal article supplement (doi:10.1039/d1cc06265d), 2022-01-01
Supplement: d1cc06265d1.pdf [file d1cc06265d1.pdf]

# Toroidal versus centripetal arrangement of the magnetic moment in a $Dy_4$ tetrahedron

Qianqian Yang, Liviu Ungur,\* Liviu F. Chibotaru and Jinkui Tang\*

## Experimental Section

**General Synthetic Considerations.** All chemicals and solvents were commercially obtained and used as received without any further purification. FTIR spectra were measured using a Nicolet 6700 Flex FTIR spectrometer equipped with smart iTR™ attenuated total reflectance (ATR) sampling accessory in the range from 500 to 4000  $cm^{-1}$ . Elemental analyses for C, H, and N were carried out on a Perkin-Elmer 2400 analyzer.

**Synthesis of  $Dy_4$ :** The complex has been synthesized by a typical “one-pot” strategy in which the ligand HL is generated in situ. A mixture of  $Dy(NO_3)_3 \cdot 6H_2O$  (0.1 mmol), 2-hydrazino benzothiazole (0.1 mmol), *o*-vanillin (0.1 mmol), methanol (10 ml), and  $Et_3N$  (0.3 mmol) was sealed in a glass vial (20 ml, capacity) and the solution was heated at 90 °C for 1 h under autogenous pressure. After the mixture was allowed to cool to room temperature (12 h), yellow block single crystals were isolated from the vial. Yield: 39.2 mg, (73.7%, based on metal salt). Elemental analysis (%) calcd for  $[Dy_4(\mu_4-O)L_2(HL)_2(CH_3O)_4] \cdot 4CH_3OH \cdot H_2O$  ( $C_{68}H_{76}Dy_4N_{12}O_{18}S_4$ , MW = 2127.64): C, 38.39, H, 3.6, N, 7.9; found C, 37.84, H, 3.47, N, 8.06. IR (solid, ATR)  $\tilde{\nu}$  [ $cm^{-1}$ ] = 3192 (br), 2939 (w), 2802 (w), 1605 (s), 1553 (m), 1521 (m), 1492 (m), 1452 (s), 1386 (s), 1313 (w), 1292 (w), 1256 (m), 1215 (s), 1167 (s), 1131 (w), 1102 (m), 1080 (w), 1067 (m), 973 (m), 933 (m), 859 (w), 823 (w), 741 (m), 671 (w), 634 (w), 557 (m), 471 (w), 415 (m).

## Crystallography

Single-crystal X-ray data of the titled complex was collected on a Bruker Apex II CCD diffractometer equipped with graphite-monochromatized Mo-K $\alpha$  radiation ( $\lambda = 0.71073$  Å) at 273 K. The structures were solved with SHELXT and refined on *F*<sup>2</sup> using all reflections with ShelXL<sup>1</sup> (full-matrix least-squares techniques) in the Olex2 package.<sup>2</sup> All non-hydrogen atoms in the whole structure were refined with anisotropic displacement parameters. Hydrogen atoms were introduced in calculated positions and refined with fixed geometry with respect to their carrier atoms. The empirical formula and derived values are in accordance with the calculated cell content. Crystallographic data are listed in Table S1. CCDC 2117123 contains the supplementary crystallographic data for this paper. These data can be obtained free of charge from the Cambridge Crystallographic Data Centre via [www.ccdc.cam.ac.uk/data\\_request/cif](http://www.ccdc.cam.ac.uk/data_request/cif).

## Magnetic Measurements

Magnetic susceptibility measurements were recorded on a Quantum Design MPMS-XL7 SQUID magnetometer equipped with a 7 T magnet. Direct current (dc) magnetic susceptibility measurements were performed on a polycrystalline sample of  $Dy_4$  in the temperature range 2–300 K, in an applied field of 1000 Oe. The field-dependent magnetizations for all complexes were measured in the field range of 0–7 T. The dynamics of the magnetization were investigated from the ac susceptibility measurements in the zero static fields and a 3.0 Oe ac oscillating field. Diamagnetic corrections were made with Pascal’s constants for all the constituent atoms as well as the contributions of the sample holder.<sup>3</sup>

Table S1 Crystallographic data of complex **Dy<sub>4</sub>**.

| <b>Dy<sub>4</sub></b>                      |                                                                                                |
|--------------------------------------------|------------------------------------------------------------------------------------------------|
| Formula                                    | C <sub>68</sub> H <sub>76</sub> Dy <sub>4</sub> N <sub>12</sub> O <sub>18</sub> S <sub>4</sub> |
| FW, g·mol <sup>-1</sup>                    | 2127.64                                                                                        |
| crystal system                             | Monoclinic                                                                                     |
| space group                                | <i>C2/c</i>                                                                                    |
| <i>T</i> , K                               | 273.15                                                                                         |
| $\lambda$ , Å                              | 0.71073                                                                                        |
| <i>a</i> , Å                               | 18.9036(9)                                                                                     |
| <i>b</i> , Å                               | 22.8201(11)                                                                                    |
| <i>c</i> , Å                               | 18.1253(9)                                                                                     |
| $\alpha$ , °                               | 90                                                                                             |
| $\beta$ , °                                | 90.2630(10)                                                                                    |
| $\gamma$ , °                               | 90                                                                                             |
| <i>V</i> , Å <sup>3</sup>                  | 7818.8(7)                                                                                      |
| <i>Z</i>                                   | 4                                                                                              |
| $\rho_{\text{calcd}}$ , g·cm <sup>-3</sup> | 1.806                                                                                          |
| F(000)                                     | 4151.9                                                                                         |
| 2 $\theta$ range [°]                       | 3.57 to 52.37                                                                                  |
| Tmax / Tmin                                | 0.471 / 0.490                                                                                  |
| measured refl.                             | 21682                                                                                          |
| unique refl. [Rint]                        | 7818, 0.0535                                                                                   |
| goodness-of-fit (F <sup>2</sup> )          | 1.005                                                                                          |
| data / restr. / param.                     | 7818 / 0 / 489                                                                                 |
| R1, wR2 (I > 2 $\sigma$ (I))               | 0.0378, 0.0756                                                                                 |
| R1, wR2 (all data)                         | 0.0550, 0.0821                                                                                 |
| res. el. dens. [e·Å <sup>-3</sup> ]        | 0.97 / -0.61                                                                                   |

Table S2 Selected bond distances (Å) and angles of complex **Dy<sub>4</sub>**.

|                            |                  |                            |                  |                                       |             |
|----------------------------|------------------|----------------------------|------------------|---------------------------------------|-------------|
| Dy1-N1                     | 2.524(4)         | Dy2-N4                     | 2.545(5)         | Dy1 <sup>#</sup> -O1-Dy1              | 104.71(19)  |
| Dy1-N3                     | 2.460(5)         | Dy2-N6                     | 2.472(5)         | Dy1 <sup>#</sup> -O1-Dy2              | 112.007(10) |
| <b>Dy1-O1</b>              | <b>2.177(3)</b>  | <b>Dy2-O1</b>              | <b>2.187(3)</b>  | Dy1 <sup>#</sup> -O1-Dy2 <sup>#</sup> | 111.887(10) |
| Dy1-O2 <sup>#</sup>        | 2.573(4)         | Dy2-O4 <sup>#</sup>        | 2.567(4)         | Dy1-O1-Dy2                            | 111.886(10) |
| Dy1-O3 <sup>#</sup>        | 2.507(4)         | Dy2-O5 <sup>#</sup>        | 2.489(4)         | Dy1-O1-Dy2 <sup>#</sup>               | 112.010(10) |
| Dy1-O3                     | 2.352(4)         | Dy2-O5                     | 2.351(3)         | Dy2-O1-Dy2 <sup>#</sup>               | 104.53(18)  |
| Dy1-O6                     | 2.275(4)         | Dy2-O6                     | 2.317(3)         | O6-Dy2-O5 <sup>#</sup>                | 135.94(12)  |
| Dy1-O7 <sup>#</sup>        | 2.333(4)         | Dy2-O7                     | 2.271(4)         | O7-Dy2-O5                             | 139.80(14)  |
| <b>Dy1-Dy1<sup>#</sup></b> | <b>3.4473(5)</b> | <b>Dy2-Dy1<sup>#</sup></b> | <b>3.6181(4)</b> | O7-Dy2-O6                             | 108.02(12)  |
| <b>Dy1-Dy2</b>             | <b>3.6156(4)</b> | <b>Dy2-Dy2<sup>#</sup></b> | <b>3.4598(6)</b> | O6-Dy1-O3                             | 140.02(13)  |
|                            |                  |                            |                  | O6-Dy1-O7 <sup>#</sup>                | 109.20(13)  |
|                            |                  |                            |                  | O7 <sup>#</sup> -Dy1-O3 <sup>#</sup>  | 135.75(13)  |

#1-X,+Y,1/2-Z

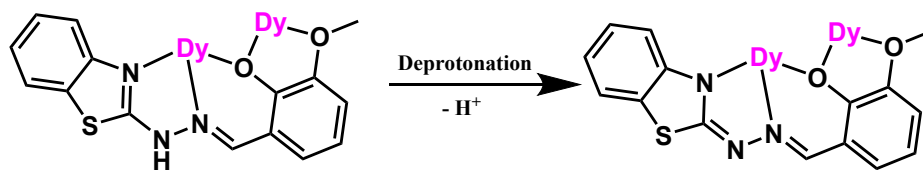

Scheme S1 Schematic drawing of the once (left) and twice (right) deprotonated ligands in the complex.

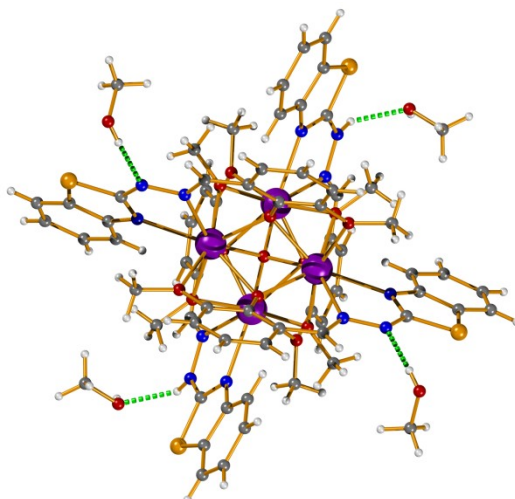

Fig. S1 Structure view of complex **Dy**<sub>4</sub> along *b* axis with purple, blue, grey, white, orange, and red spheres representing Dy, N, C, H, S, and O, respectively; some solvents have been omitted for clarity. The green dash lines represent the hydrogen bondings.

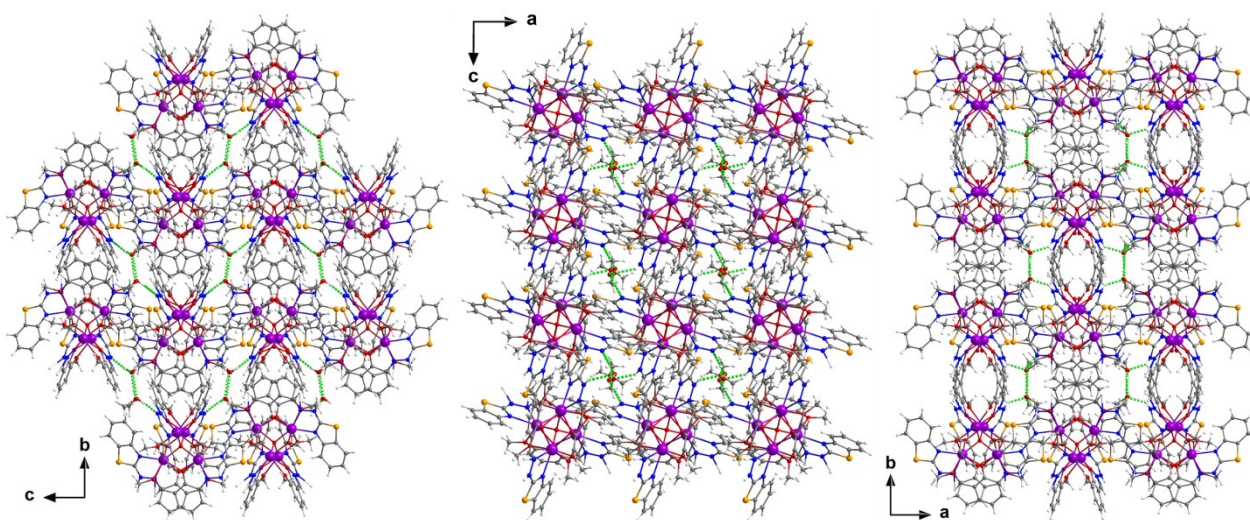

Fig. S2 Packing models along *a*, *b*, and *c* axes of complex **Dy**<sub>4</sub> with purple, blue, grey, white, orange, and red spheres representing Dy, N, C, H, S, and O, respectively. The green dash lines represent the hydrogen bondings.

Table S3 The *CShM* values calculated by *SHAPE* 2.1 for **Dy<sub>4</sub>**.

| Central atom                    | Coordination Geometry                               | Dy1    | Dy2    |
|---------------------------------|-----------------------------------------------------|--------|--------|
| Dy                              | Cube ( $O_h$ )                                      | 9.851  | 9.968  |
|                                 | Square antiprism ( $D_{4d}$ )                       | 1.720  | 1.759  |
|                                 | Triangular dodecahedron ( $D_{2d}$ )                | 2.980  | 3.103  |
|                                 | Johnson gyrobifastigium J26 ( $D_{2d}$ )            | 14.135 | 14.307 |
|                                 | Johnson elongated triangular bipyramid ( $D_{3h}$ ) | 25.957 | 26.288 |
|                                 | Biaugmented trigonal prism ( $C_{2v}$ )             | 2.750  | 2.918  |
| Snub diphenoid J84 ( $D_{2d}$ ) | 4.735                                               | 5.021  |        |

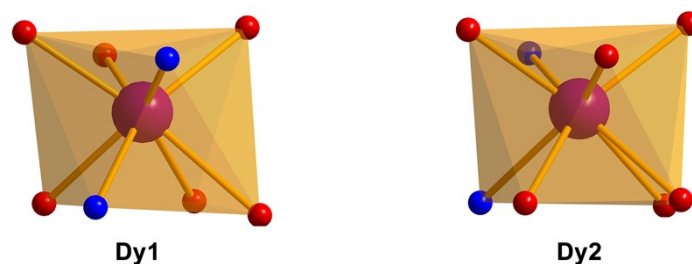

Fig. S3 Coordination polyhedrons of Dy1 (left) and Dy2 (right) in complex **Dy<sub>4</sub>**.

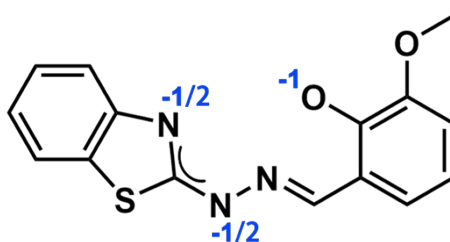

Fig. S4 Partial charges assigned to the formally ligand in complex **Dy<sub>4</sub>**.

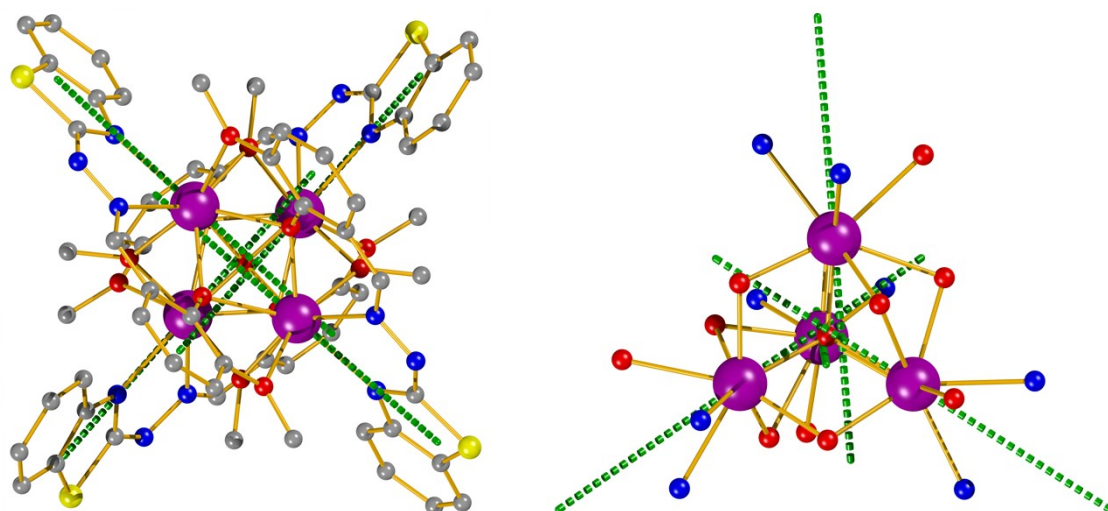

Fig. S5 Ground-state magnetic anisotropy in the molecule (left) and the relevant magnetic anisotropy orientations in **Dy<sub>4</sub>** core (right) of complex **Dy<sub>4</sub>**. The green dash lines represent the orientations of the anisotropic axes for each **Dy<sup>III</sup>** ion, as calculated by the electrostatic model.

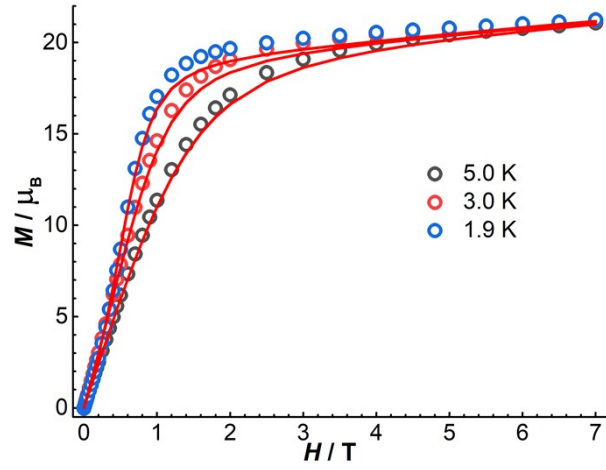

Fig. S6 Molar magnetization ( $M$ ) vs.  $H$  for  $\text{Dy}_4$  at 1.9, 3.0, and 5.0 K. The red lines represent the calculation results.

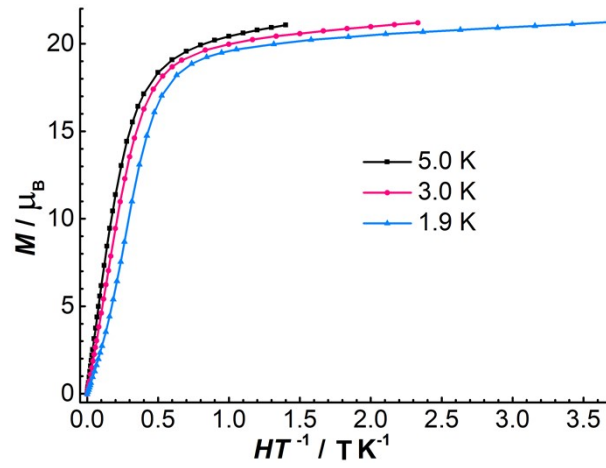

Fig. S7 Molar magnetization ( $M$ ) vs.  $H/T$  for  $\text{Dy}_4$  at 1.9, 3.0, and 5.0 K.

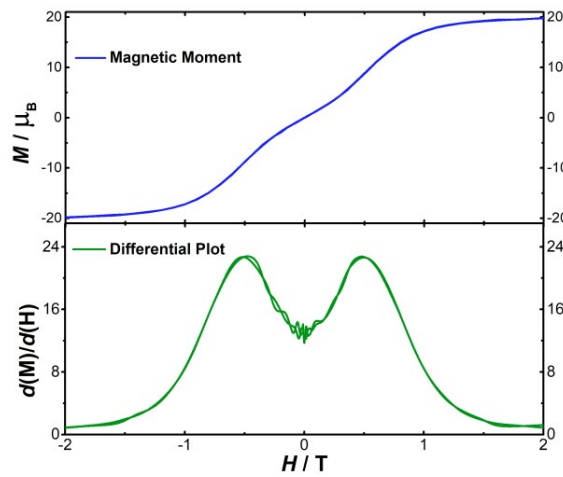

Fig. S8 Field-dependent magnetic moment (top) and the relevant differential plot (bottom) of  $\text{Dy}_4$  at 1.9 K.

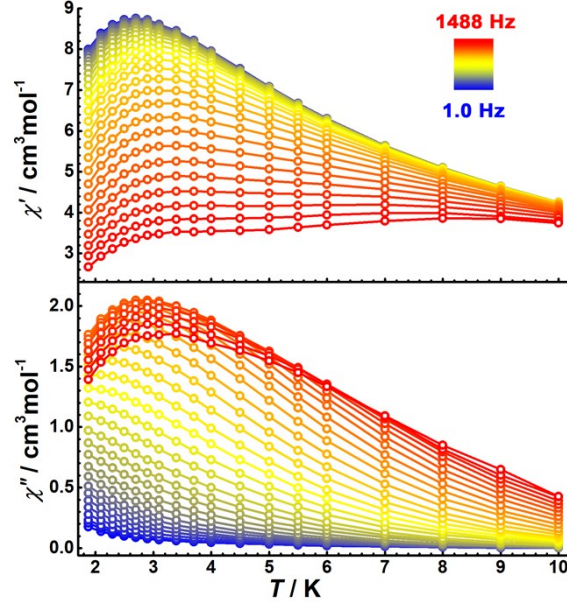

Fig. S9 Temperature-dependent ac susceptibility for  $\text{Dy}_4$  at indicated frequencies under zero dc field.

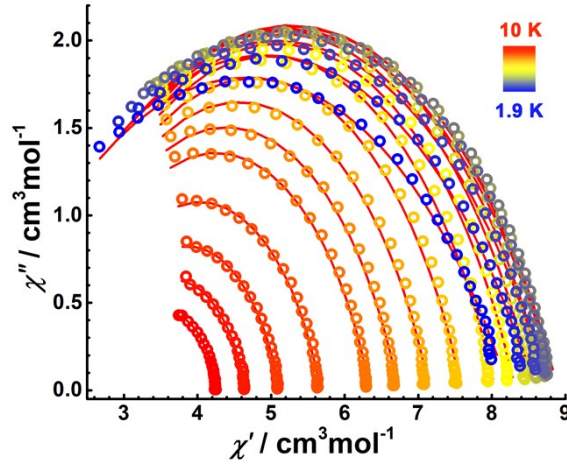

Fig. S10 Cole-Cole plots for  $\text{Dy}_4$  at zero field between 1.9 and 10 K. The solid lines indicate the best fits.

Table S4. The best fit of frequency-dependent ac susceptibility of  $\text{Dy}_4$  under zero dc field.

| $T / \text{K}$ | $\chi_s$ | $\chi_T$ | $\tau / \text{s}$ | $\alpha$ | <i>Residual</i> |
|----------------|----------|----------|-------------------|----------|-----------------|
| 10             | 3.05747  | 4.25431  | 6.98266E-5        | 0.20362  | 0.00574         |
| 9              | 2.77786  | 4.65446  | 9.33179E-5        | 0.24941  | 0.01223         |
| 8              | 2.64239  | 5.11417  | 1.20528E-4        | 0.2518   | 0.01662         |
| 7              | 2.41162  | 5.66787  | 1.51041E-4        | 0.25584  | 0.02629         |
| 6              | 2.16912  | 6.34176  | 1.92256E-4        | 0.26511  | 0.04457         |
| 5.5            | 2.05888  | 6.72586  | 2.17302E-4        | 0.27044  | 0.05798         |
| 5              | 1.98422  | 7.14875  | 2.47967E-4        | 0.27629  | 0.07458         |
| 4.5            | 1.93755  | 7.59079  | 2.81254E-4        | 0.28229  | 0.09218         |
| 4              | 1.8895   | 8.04819  | 3.1489E-4         | 0.29226  | 0.10901         |
| 3.7            | 1.84571  | 8.31913  | 3.34674E-4        | 0.29996  | 0.11296         |
| 3.4            | 1.79977  | 8.56545  | 3.54506E-4        | 0.30962  | 0.12458         |

|     |         |         |            |         |         |
|-----|---------|---------|------------|---------|---------|
| 3.1 | 1.70756 | 8.73629 | 3.72729E-4 | 0.32262 | 0.1256  |
| 2.9 | 1.69529 | 8.85667 | 3.965E-4   | 0.32807 | 0.11392 |
| 2.7 | 1.61233 | 8.89935 | 4.16029E-4 | 0.3384  | 0.10429 |
| 2.5 | 1.51713 | 8.87692 | 4.41491E-4 | 0.35124 | 0.09577 |
| 2.3 | 1.39118 | 8.76199 | 4.77491E-4 | 0.36732 | 0.07524 |
| 2.1 | 1.24955 | 8.56935 | 5.20648E-4 | 0.38556 | 0.05684 |
| 1.9 | 1.07871 | 8.22899 | 5.94407E-4 | 0.4095  | 0.044   |

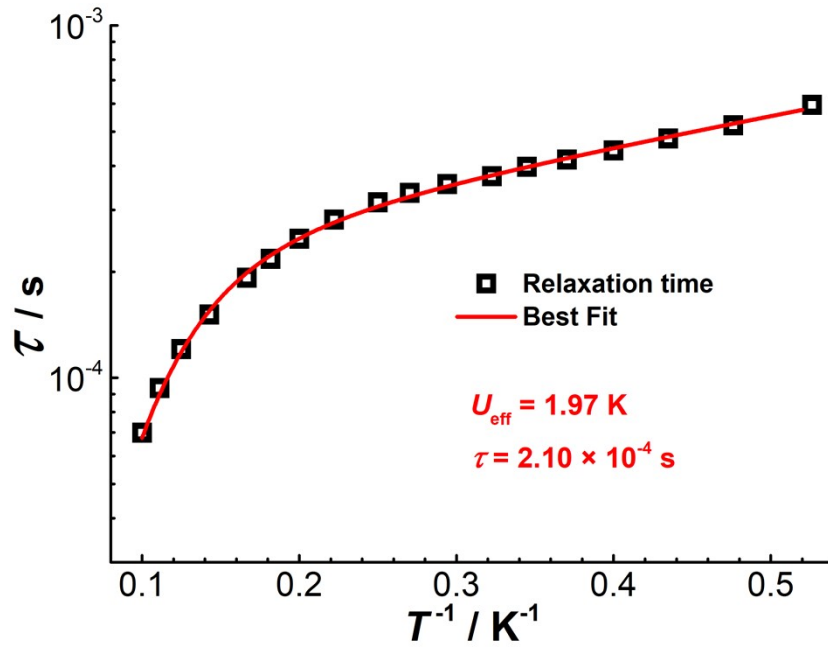

Fig. S11 Plot of  $\tau$  vs.  $T^{-1}$  for  $\text{Dy}_4$  obtained under zero dc fields over the temperature range 1.9–10 K. The red line represents the best-fitted result.

### Ab initio calculation on individual lanthanide fragment

All calculations were done with OpenMOLCAS (master version of 08 July 2021) and are of CASSCF/RASSI/SINGLE\_ANISO type.<sup>4</sup> The mononuclear Dy<sup>III</sup> fragments have the same structure as the initial Dy<sub>4</sub> complex, in which all other three Dy ions were computationally substituted by diamagnetic Lu. DZP basis sets approximations have been employed. Active space of the CASSCF method included 9 electrons in 7 orbitals for Dy (4f orbitals of Dy<sup>III</sup> ion). To exclude all the doubts, we calculated all the roots in the active space. The state-averaged CASSCF orbitals of the sextets, quartets, and doublets were optimized with 21, 224, and 490 states, respectively. We have mixed the maximum number of spin-free states which was possible with our hardware. On the basis of the resulting spin-orbital multiplets, SINGLE\_ANISO program computed local magnetic properties (g-tensors, magnetic axes, local magnetic susceptibility, etc.). The magnetic properties of the entire complex, involving four Dy<sup>III</sup> centers were calculated by the POLY\_ANISO program, in which the anisotropic exchange interactions were simulated within the Lines model.<sup>5</sup>

Table S5 Energies (cm<sup>-1</sup>) and g tensors of the lowest Kramers doublets (KD) on individual Dy<sup>III</sup> ions.

| KD |    | Dy1     |         | Dy2     |         | Dy1'    |         | Dy2'    |         |
|----|----|---------|---------|---------|---------|---------|---------|---------|---------|
|    |    | E       | g       | E       | g       | E       | g       | E       | g       |
| 1  | gx |         | 0.0080  |         | 0.0568  |         | 0.0080  |         | 0.0568  |
|    | gy | 0.000   | 0.0189  | 0.000   | 0.1659  | 0.000   | 0.0189  | 0.000   | 0.1659  |
|    | gz |         | 19.5032 |         | 18.3020 |         | 19.5032 |         | 18.3020 |
| 2  | gx |         | 0.0807  |         | 0.1114  |         | 0.0807  |         | 0.1114  |
|    | gy | 76.902  | 0.1673  | 46.262  | 0.2741  | 76.885  | 0.1673  | 46.262  | 0.2741  |
|    | gz |         | 19.0440 |         | 16.5280 |         | 19.0440 |         | 16.5280 |
| 3  | gx |         | 0.7951  |         | 1.7246  |         | 0.7951  |         | 1.7246  |
|    | gy | 143.492 | 1.0665  | 151.754 | 2.4218  | 143.490 | 1.0665  | 151.754 | 2.4218  |
|    | gz |         | 16.3288 |         | 14.0092 |         | 16.3288 |         | 14.0092 |
| 4  | gx |         | 2.3590  |         | 0.2949  |         | 2.3590  |         | 0.2949  |
|    | gy | 199.221 | 3.4409  | 186.842 | 1.6269  | 199.214 | 3.4409  | 186.842 | 1.6269  |
|    | gz |         | 12.1360 |         | 14.6852 |         | 12.1360 |         | 14.6852 |
| 5  | gx |         | 8.2544  |         | 2.2936  |         | 8.2544  |         | 2.2936  |
|    | gy | 260.383 | 6.1164  | 223.587 | 4.2689  | 260.374 | 6.1164  | 223.586 | 4.2689  |
|    | gz |         | 2.0996  |         | 9.0353  |         | 2.0996  |         | 9.0353  |
| 6  | gx |         | 0.7727  |         | 2.4911  |         | 0.7727  |         | 2.4911  |
|    | gy | 330.673 | 4.4454  | 261.827 | 4.6264  | 330.659 | 4.4454  | 261.827 | 4.6264  |
|    | gz |         | 10.0012 |         | 11.8834 |         | 10.0012 |         | 11.8834 |
| 7  | gx |         | 1.3283  |         | 0.1375  |         | 1.3283  |         | 0.1375  |
|    | gy | 363.065 | 5.1869  | 366.232 | 0.1991  | 363.046 | 5.1869  | 366.232 | 0.1991  |
|    | gz |         | 14.8360 |         | 18.9947 |         | 14.8360 |         | 18.9947 |
| 8  | gx |         | 0.0106  |         | 0.0214  |         | 0.0106  |         | 0.0214  |
|    | gy | 551.766 | 0.0210  | 505.620 | 0.0506  | 551.764 | 0.0210  | 505.620 | 0.0506  |
|    | gz |         | 19.6880 |         | 19.6637 |         | 19.6880 |         | 19.6637 |



Table S6 Energies of the lowest spin-orbit states ( $\text{cm}^{-1}$ ).

| spin-orbit states ( $\text{cm}^{-1}$ ) |         |         |         |
|----------------------------------------|---------|---------|---------|
| Dy1                                    | Dy2     | Dy1'    | Dy2'    |
| 0.000                                  | 0.000   | 0.000   | 0.000   |
| 76.902                                 | 46.262  | 76.885  | 46.262  |
| 143.492                                | 151.754 | 143.490 | 151.754 |
| 199.221                                | 186.842 | 199.214 | 186.842 |
| 260.383                                | 223.587 | 260.374 | 223.586 |
| 330.673                                | 261.827 | 330.659 | 261.827 |
| 363.065                                | 366.232 | 363.046 | 366.232 |
| 551.766                                | 505.620 | 551.764 | 505.620 |

Table S7 Angles between the main magnetic axes corresponding to the ground Kramers doublets on Dy centers (degrees).

|      | Dy1    | Dy2    | Dy1'   | Dy2'   |
|------|--------|--------|--------|--------|
| Dy1  | 0.000  | 55.008 | 63.103 | 82.315 |
| Dy2  | 55.008 | 0.000  | 82.315 | 85.025 |
| Dy1' | 63.103 | 82.315 | 0.000  | 55.008 |
| Dy2' | 82.315 | 85.025 | 55.008 | 0.000  |

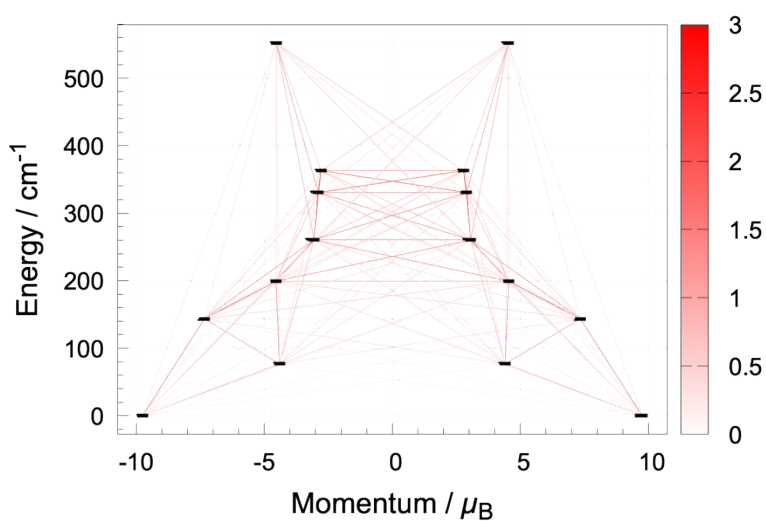

Fig. S12 Energy vs. momentum for the ground  $J=15/2$  of Dy1 site. The intensity of the red lines indicates the amplitude of the average transition magnetic dipole moment in  $\mu_B$  between the connected states (see the legend in the right-hand side), the square of which roughly scales with the rate of spin-phonon transition between them. The most intense lines outline the magnetization blocking barrier (solid red lines).

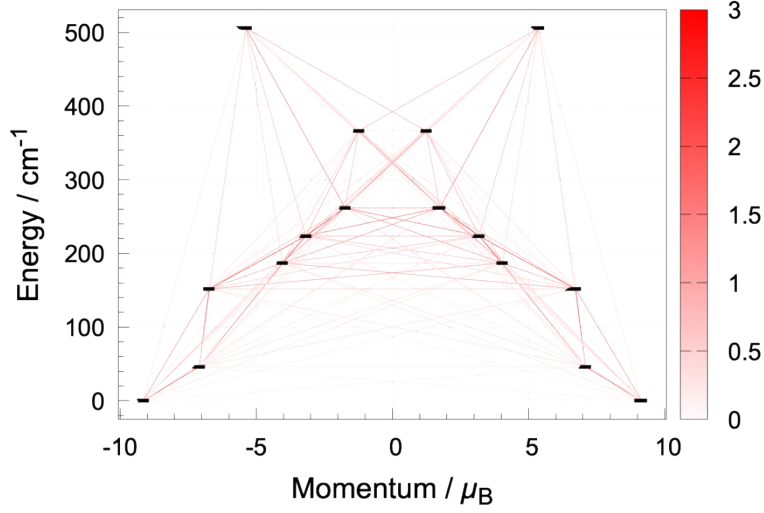

Fig. S13 Energy vs. momentum for the ground  $J=15/2$  of Dy2 site. The intensity of the red lines indicates the amplitude of the average transition magnetic dipole moment in  $\mu_B$  between the connected states (see the legend in the right-hand side), the square of which roughly scales with the rate of spin-phonon transition between them. The most intense lines outline the magnetization blocking barrier (solid red lines).

### Model of the exchange interaction in Dy<sub>4</sub> complex

The magnetic interactions between Dy<sup>III</sup> ions include contributions from magnetic dipole–dipole and exchange interactions. The exchange coupling was simulated within the Lines model as described elsewhere.<sup>5</sup> Magnetic behavior of four interacting Dy<sup>III</sup> ions was described using a noncollinear Ising Hamiltonian with one coupling constant:

$$\hat{H}_{exch} = -J \left( \hat{s}_{Dy_1} \hat{s}_{Dy_2} + \hat{s}_{Dy_1} \hat{s}_{Dy_1'} + \hat{s}_{Dy_1} \hat{s}_{Dy_2'} + \hat{s}_{Dy_2} \hat{s}_{Dy_1'} + \hat{s}_{Dy_2} \hat{s}_{Dy_2'} + \hat{s}_{Dy_1'} \hat{s}_{Dy_2'} \right) \quad (\text{Eq. 1})$$

where  $s_i$  are projection operators of the effective spin of Dy<sup>III</sup> ion on the corresponding anisotropy axis.  $J$  is the parameter of the inter-site magnetic exchange interaction and represents the only fitting parameters of the employed model. The inter-site magnetic dipole-dipole interaction is computed using Eq. (2) and added to the exchange Hamiltonian:

$$\hat{H}_{dip}(i,j) = \mu_{Bohr}^2 \times \frac{\hat{\mu}_i \cdot \hat{\mu}_j - 3(\hat{\mu}_i \cdot n_{ij})(\hat{\mu}_j \cdot n_{ij})}{r_{ij}^3} \quad (\text{Eq. 2})$$

where  $\hat{\mu}_i \hat{\mu}_j$  are the magnetic moments on the sites  $i$  and  $j$ , respectively, as obtained from the SINGLE\_ANISO single-site calculations,  $n_{ij}$  is the normalized vector connecting sites  $i$  and  $j$  (of length = 1),  $r_{ij}$  is the distance between magnetic sites  $i$  and  $j$ , while  $\mu_{Bohr}^2$  is the square Bohr magneton constant, with an approximate value of 0.4329702 cm<sup>-1</sup>/Tesla. The total Hamiltonian of magnetic interaction is a sum of the two operators:

$$\hat{H}_{total} = \hat{H}_{exch} + \hat{H}_{dip}$$

(Eq. 3)

The low-lying energy spectra obtained by diagonalization of the  $\hat{H}_{total}$  and of individual  $\hat{H}_{exch}$  and  $\hat{H}_{dip}$  are given in Table S8. The energy splitting gives a rough estimation on the importance of exchange and dipolar couplings on the total interaction. As such, for the considered Dy<sub>4</sub> the dipole-dipole interaction induces a weaker energy splitting compared to exchange interaction.

The eigenstates of  $\hat{H}_{total}$  are further used for the description of magnetic susceptibility and molar magnetization of the entire tetranuclear compounds. The parameters  $J$  were found by minimization of the standard deviation function between measured and calculated magnetic susceptibility. Given that the exchange interaction is rather weak and induces weak splitting, only the low-temperature experimental data points, below 70 K, were considered in the fitting. This task was achieved within the POLY\_ANISO code. The best fit gives the coupling value  $J = -0.24565 \text{ cm}^{-1}$ .

Table S8 Energies of the lowest spin-orbit states ( $\text{cm}^{-1}$ ).

| Low-lying exchange states ( $\text{cm}^{-1}$ ) |                    |            |                 |
|------------------------------------------------|--------------------|------------|-----------------|
| Exchange only                                  | Dipole-dipole only | Total      | Total, relative |
| -2.6411939                                     | -0.8268643         | -3.4747321 | 0.000000000     |
| -2.6411939                                     | -0.8268643         | -3.4747321 | 0.000000000     |
| -0.5406321                                     | -0.5065744         | -1.0485004 | 2.426231694     |
| -0.5405842                                     | -0.5065722         | -1.0484983 | 2.426233849     |
| -0.5403501                                     | -0.5050773         | -1.0483397 | 2.426392428     |
| -0.5403020                                     | -0.5050751         | -1.0483375 | 2.426394586     |
| -0.4692778                                     | -0.0937192         | 0.3870260  | 3.861758241     |
| -0.4692777                                     | -0.0937191         | 0.3870260  | 3.861758243     |
| 0.4903774                                      | -0.0224825         | 0.9630230  | 4.437755225     |
| 0.4903886                                      | -0.0224824         | 0.9630384  | 4.437770638     |
| 0.4910579                                      | 0.4767332          | 0.9652786  | 4.440010783     |
| 0.4910691                                      | 0.4767530          | 0.9652943  | 4.440026494     |
| 1.1290081                                      | 0.4774673          | 1.1116337  | 4.586365877     |
| 1.1290081                                      | 0.4774870          | 1.1116340  | 4.586366194     |
| 1.8814458                                      | 0.8841908          | 1.8038297  | 5.278561938     |
| 1.8814458                                      | 0.8841908          | 1.8038297  | 5.278561951     |
| ...                                            | ...                | ...        | ...             |

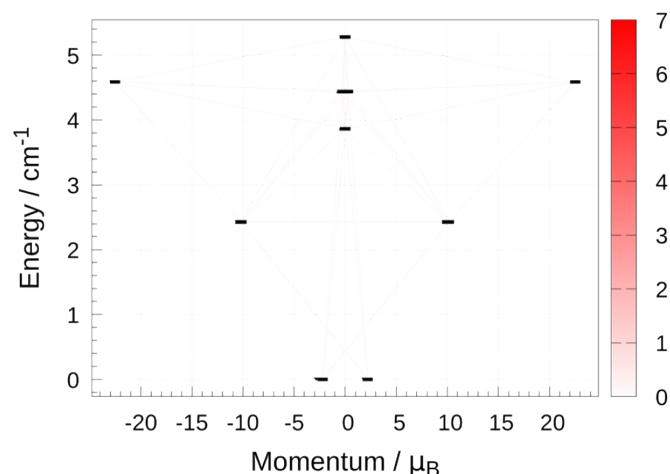

Fig. S14 Exchange magnetization blocking barrier for  $\mathbf{Dy}_4$ . Each doublet state  $\pm M_J$  arising from the magnetic coupling of the ground Kramers doublets on  $\text{Dy}^{\text{III}}$  ions. The intensity of the pink lines indicates the amplitude of the average transition magnetic dipole moment in  $\mu_B$  between the connected states (see the legend in the right-hand side), the square of which roughly scales with the rate of spin-phonon transition between them. The most intense lines outline the magnetization blocking barrier (solid red lines). The almost incolor transition lines indicate that the relaxation within the exchange path is not effective: temperature-assisted relaxation is due to relaxation on individual ions, mainly  $\text{Dy}2$  and  $\text{Dy}2'$ . The sites  $\text{Dy}1$  and  $\text{Dy}1'$  define the relaxation barrier height in this compound.

## References

- [1] a) G. M. Sheldrick, A short history of SHELX, *Acta Crystallogr., Sect. A*, 2008, **64**, 112-122; b) *SHELXS-97 Program for Crystal Structure Solution*, University of Göttingen: Germany, 1997.
- [2] O. V. Dolomanov, L. J. Bourhis, R. J. Gildea, J. A. K. Howard, H. Puschmann, OLEX2: a complete structure solution, refinement and analysis program, *J. Appl. Crystallogr.*, 2009, **42**, 339-341.
- [3] E. A. Boudreaux, L. N. Mulay, *Theory and Applications of Molecular Paramagnetism*, John Wiley & Sons: New York, 1976.
- [4] I. Fdez. Galván, M. Vacher, A. Alavi, C. Angeli, F. Aquilante, J. Autschbach, J. J. Bao, S. I. Bokarev, N. A. Bogdanov, R. K. Carlson, L. F. Chibotaru, J. Creutzberg, N. Dattani, M. G. Delcey, S. S. Dong, A. Dreuw, L. Freitag, L. M. Frutos, L. Gagliardi, F. Gendron, A. Giussani, L. González, G. Grell, M. Guo, C. E. Hoyer, M. Johansson, S. Keller, S. Knecht, G. Kovačević, E. Källman, G. Li Manni, M. Lundberg, Y. Ma, S. Mai, J. P. Malhado, P. Å. Malmqvist, P. Marquetand, S. A. Mewes, J. Norell, M. Olivucci, M. Oppel, Q. M. Phung, K. Pierloot, F. Plasser, M. Reiher, A. M. Sand, I. Schapiro, P. Sharma, C. J. Stein, L. K. Sørensen, D. G. Truhlar, M. Ugandi, L. Ungur, A. Valentini, S. Vancoillie, V. Veryazov, O. Weser, T. A. Wesolowski, P.-O. Widmark, S. Wouters, A. Zech, J. P. Zobel, R. Lindh, OpenMolcas: From Source Code to Insight, *J. Chem. Theory Comput.*, 2019, **15**, 5925-5964.
- [5] M. E. Lines, Orbital Angular Momentum in the Theory of Paramagnetic Clusters, *J. Chem. Phys.*, 1971, **55**, 2977-2984.
